# Supplementary material for: The Endocannabinoid System: A Target for Cancer Treatment
Source: PubMed Central journal article supplement (PMC7037210; doi:10.3390/ijms21030747), 2020-01-23
Supplement: ijms-21-00747-s001.pdf [file ijms-21-00747-s001.pdf]

**Table S1.** Anticancer effects of cannabinoids with relative references

| Cannabinoid | Effects | References |
|-------------|---------|------------|
|-------------|---------|------------|

|                                                                 |                                                                                                                                                                                                                                                                                                                                                                                                                                                                                                                                                                                                                                                                                                                                                                                                                                                                                                                                                                                                                                      |                                                                                                                                                                                                                                                                                                   |
|-----------------------------------------------------------------|--------------------------------------------------------------------------------------------------------------------------------------------------------------------------------------------------------------------------------------------------------------------------------------------------------------------------------------------------------------------------------------------------------------------------------------------------------------------------------------------------------------------------------------------------------------------------------------------------------------------------------------------------------------------------------------------------------------------------------------------------------------------------------------------------------------------------------------------------------------------------------------------------------------------------------------------------------------------------------------------------------------------------------------|---------------------------------------------------------------------------------------------------------------------------------------------------------------------------------------------------------------------------------------------------------------------------------------------------|
| <p><b>Anandamide</b><br/><b>(AEA)</b></p>                       | <p><u>Lung cancer:</u></p> <ul style="list-style-type: none"> <li>• Inhibition of lung cancer cells spreading</li> </ul> <p><u>Gastrointestinal cancer:</u></p> <ul style="list-style-type: none"> <li>• Reduction of cell volume and density; induction of G0/G1 cell cycle arrest and apoptosis (Gastric)</li> <li>• Reduction of tumor growth <i>in vivo</i>; downregulation of angiogenic factors VEGF-C, VEGF-R2, and VEGF-R3 <i>in vivo</i> (Cholangiocarcinoma)</li> <li>• Tumor suppressive effect via GPR55 depending on JNK activation <i>in vitro</i> and <i>in vivo</i> (Cholangiocarcinoma)</li> </ul> <p><u>Breast cancer:</u></p> <ul style="list-style-type: none"> <li>• Modulation cAMP/protein kinase A and MAPK pathway</li> <li>• Inhibition cell cycle progression G1/S transition</li> </ul> <p><u>Prostate cancer:</u></p> <ul style="list-style-type: none"> <li>• Decrease the proliferative action of EGF and cycle cellular arrest in the G1 phase</li> <li>• Increase apoptosis and necrosis</li> </ul> | <ul style="list-style-type: none"> <li>• Winkler et al. [17]</li> <li>• Ortega et al. [42]</li> <li>• DeMorrow et al. [43]</li> <li>• DeMorrow et al. [43]</li> <li>• Huang et al. [44]</li> <li>• Kiskovà et al. [74]</li> <li>• Mimeault et al. [86]</li> <li>• Sarfaraz et al. [85]</li> </ul> |
| <p><b>R(+)-methanandamide</b><br/><b>(Met-AEA o AM-356)</b></p> | <p><u>Gastrointestinal cancers:</u></p> <ul style="list-style-type: none"> <li>• G0/G1 cell cycle arrest and necrosis induction (Gastric)</li> </ul>                                                                                                                                                                                                                                                                                                                                                                                                                                                                                                                                                                                                                                                                                                                                                                                                                                                                                 | <ul style="list-style-type: none"> <li>• Ortega et al. [42]</li> </ul>                                                                                                                                                                                                                            |
| <p><b>2-methyl-2'-F-anandamide</b><br/><b>(Met-F-AEA)</b></p>   | <p><u>Lung cancer:</u></p> <ul style="list-style-type: none"> <li>• In combination with the FAAH inhibitor URB597 caused G0/G1 cell cycle arrest mediated apoptosis</li> <li>• Reduced metastasis inhibiting migratory structures formation as well as MMPs secretion</li> </ul> <p><u>Gastrointestinal cancers:</u></p> <ul style="list-style-type: none"> <li>• Increase of AEA availability; decrease of proliferation rate due to CB1 up-regulation through the transcriptional activation of CNR1 promoter (Colorectal)</li> </ul> <p><u>Breast cancer:</u></p> <ul style="list-style-type: none"> <li>• Antiproliferative activity</li> <li>• Inhibition of the EMT</li> </ul> <p><u>Thyroid cancer:</u></p> <ul style="list-style-type: none"> <li>• Increase apoptosis via activation of p53 signalling and expression of p21</li> </ul>                                                                                                                                                                                     | <ul style="list-style-type: none"> <li>• Ravi et al. [66]</li> <li>• Ravi et al. [71]</li> <li>• Proto et al. [45]</li> <li>• Laezza et al., [79]</li> <li>• Laezza et al., [80]</li> <li>• Grimaldi et al [81]</li> <li>• Cozzolino et al. [105]</li> </ul>                                      |
| <p><b>arachidonyl-2-chloroethylamide</b><br/><b>(ACEA)</b></p>  | <p><u>Lung cancer:</u></p> <ul style="list-style-type: none"> <li>• Inhibition of angiogenic and lymphangiogenic factors release</li> </ul> <p><u>Breast cancer:</u></p> <ul style="list-style-type: none"> <li>• Decrease the invasive potential of breast cancer stem cells</li> </ul> <p><u>Pancreatic cancer:</u></p> <ul style="list-style-type: none"> <li>• Induction of ROS-mediated autophagy via activation of AMPK and inhibition of energetic metabolism</li> </ul>                                                                                                                                                                                                                                                                                                                                                                                                                                                                                                                                                      | <ul style="list-style-type: none"> <li>• Staiano et al. [63]</li> <li>• Elbaz et al. [76]</li> <li>• Dando et al. [100]</li> </ul>                                                                                                                                                                |

|                                                                                      |                                                                                                                                                                                                                                                                                                                                                                                                                                                                                                                                                                                                                                                                                                                                                                                                                                                                                                                                                                                                                                                                                                                                                                                                                                                                                                                                                                                                         |                                                                                                                                                                                                                                                                                                                                                                                                             |
|--------------------------------------------------------------------------------------|---------------------------------------------------------------------------------------------------------------------------------------------------------------------------------------------------------------------------------------------------------------------------------------------------------------------------------------------------------------------------------------------------------------------------------------------------------------------------------------------------------------------------------------------------------------------------------------------------------------------------------------------------------------------------------------------------------------------------------------------------------------------------------------------------------------------------------------------------------------------------------------------------------------------------------------------------------------------------------------------------------------------------------------------------------------------------------------------------------------------------------------------------------------------------------------------------------------------------------------------------------------------------------------------------------------------------------------------------------------------------------------------------------|-------------------------------------------------------------------------------------------------------------------------------------------------------------------------------------------------------------------------------------------------------------------------------------------------------------------------------------------------------------------------------------------------------------|
|                                                                                      | <ul style="list-style-type: none"> <li>• Inhibition of glycolysis via decreasing of the glycolytic enzymes, GAPDH and PKM2</li> <li>• Increase of the anticancer potential in combination with gemcitabine</li> </ul>                                                                                                                                                                                                                                                                                                                                                                                                                                                                                                                                                                                                                                                                                                                                                                                                                                                                                                                                                                                                                                                                                                                                                                                   | <ul style="list-style-type: none"> <li>• Donadelli et al.[101]</li> </ul>                                                                                                                                                                                                                                                                                                                                   |
| <p style="text-align: center;"><b>Δ9-tetrahydrocannabinol</b><br/>(THC o Δ9-THC)</p> | <p><u>Brain Cancer :</u></p> <ul style="list-style-type: none"> <li>• THC reduce tumor growth in orthotopic and subcutaneous animal models of glioma</li> <li>• Increase in formation of ROS linked with apoptosis</li> <li>• THC and /or CBD induce a cell cycle arrest</li> <li>• THC could reduce pro-angiogenic VEGF levels in two patients with recurrent GBM</li> <li>• THC was able to down regulate TIMP-1 and MMP-2</li> <li>• clinical trial NCT01812603 of THC:CBD in combination with dose-intense TMZ</li> </ul> <p><u>Lung cancer:</u></p> <ul style="list-style-type: none"> <li>• Inhibition of tumor growth <i>in vivo</i> and <i>in vitro</i></li> <li>• Reduction of signalling molecules(FAK, ERK1/2 and AKT) involved in survival and ECM remodelling</li> </ul> <p><u>Gastrointestinal cancers:</u></p> <ul style="list-style-type: none"> <li>• Induction of apoptosis and downregulation of PI3K/Akt pathway (Colorectal)</li> <li>• Inhibition of tumor growth <i>in vitro</i> and <i>in vivo</i> associated to increased ceramide, ER-stress, PPAR-γ activity and autophagy (Hepatocellular)</li> </ul> <p><u>Pancreatic cancer:</u></p> <ul style="list-style-type: none"> <li>• Induction of apoptosis via stimulation of the <i>de novo</i> ceramide synthesis and consequent up-regulation of ER stress-related genes <i>p8</i>, <i>atf-4</i> and <i>trb3</i>.</li> </ul> | <ul style="list-style-type: none"> <li>• Rocha et al. [111]</li> <li>• Marcu et al. [113]</li> <li>• Marcu et al., [113]</li> <li>• Blázquez et al. [117]</li> <li>• Blázquez et al., [123]</li> <li>• Schultz and Beyer, [128,129],</li> <li>• Munson et al., [65]</li> <li>• Preet et al., [67]</li> <li>• Greenhough et al. [52]</li> <li>• Vara et al. [53]</li> <li>• Carracedo et al. [99]</li> </ul> |
| <p style="text-align: center;"><b>Cannabidiol</b><br/>(CBD)</p>                      | <p><u>Brain cancer:</u></p> <ul style="list-style-type: none"> <li>• CBD reduce tumor growth in orthotopic and xenograft animal models of Glioma</li> <li>• Increase of ROS and upregulation of heat-shock protein (HSP) super family</li> <li>• Induce endothelial cell cytoskeleton, inhibited endothelial cell migration and angiogenesis <i>in vivo</i></li> <li>• Anti-invasive effect in GBM cell lines with inhibition of Id-1 expression</li> <li>• Treatment with CBD inducing autophagy and abrogating the chemoresistance of GSCs at BCNU therapy</li> </ul> <p><u>Lung cancer:</u></p> <ul style="list-style-type: none"> <li>• PPARγ-dependent apoptosis; decrease of cellular migration associated to ICAM1 and TIMP1 induction</li> <li>• Decrease of invasiveness associated to PAI1 downregulation</li> </ul> <p><u>Gastrointestinal cancer:</u></p> <ul style="list-style-type: none"> <li>• Decrease of cell proliferation, increase of endocannabinoid levels and chemoprotective effect DNA from oxidative insults <i>in vitro</i>; reduction of invasion and migration <i>in vitro</i> (Colorectal)</li> <li>• Decrease of aberrant crypt foci (ACF) formation, precancerous polyps and tumors in AOM-treated mice counteracting Akt activation induced by AOM (Colorectal)</li> </ul>                                                                                            | <ul style="list-style-type: none"> <li>• Rocha et al. [111]</li> <li>• Scott et al. [114]</li> <li>• Solinas et al. [118]</li> <li>• Soroceanu et al.[121]</li> <li>• Nabissi et al. [126]</li> <li>• Ramer et al. [5]</li> <li>• Ramer et al. [70]</li> <li>• Aviello et al. [49]</li> </ul>                                                                                                               |

|                         |                                                                                                                                                                                                                                                                                                                                                                                                                                                                                                                                                                                                                                                                                                                                                                                                                                                                                                                                                                                                                                                                                                                                                    |                                                                                                                                                                                                                                                                                                       |
|-------------------------|----------------------------------------------------------------------------------------------------------------------------------------------------------------------------------------------------------------------------------------------------------------------------------------------------------------------------------------------------------------------------------------------------------------------------------------------------------------------------------------------------------------------------------------------------------------------------------------------------------------------------------------------------------------------------------------------------------------------------------------------------------------------------------------------------------------------------------------------------------------------------------------------------------------------------------------------------------------------------------------------------------------------------------------------------------------------------------------------------------------------------------------------------|-------------------------------------------------------------------------------------------------------------------------------------------------------------------------------------------------------------------------------------------------------------------------------------------------------|
|                         | <ul style="list-style-type: none"> <li>• Induction of apoptosis due to ROS production by mitochondria, ER stress induction and NoxA activation (Colorectal)</li> <li>• Anti-angiogenic and anti-metastatic effects associated to VEGF downregulation <i>in vivo</i>; reduction IL-6 and IL-8 serum levels (Colorectal)</li> </ul> <p><u>Breast cancer</u></p> <ul style="list-style-type: none"> <li>• Inhibition of cell viability</li> <li>• Induction of apoptosis/autophagy and ROS generation</li> <li>• Cell cycle arrest at the G1/S transition (via CB1-R) and at the G2/M phase (via CB2-R)</li> <li>• Invasiveness reduction via ID-1</li> <li>• Inhibition cell migration and angiogenesis</li> <li>• Modulation tumor microenvironment and cytokine production</li> <li>• Increase overexpression of the TRPV2 in TNBC cells</li> </ul> <p><u>Prostate cancer:</u></p> <ul style="list-style-type: none"> <li>• Inhibits spheroid formation in cancer stem cells from LNCaP</li> <li>• Downregulate VEGF, PSA and proinflammatory cytokines IL-6/IL.8</li> <li>• <i>In vivo</i> reduce tumor size in LNCaP xenografted mice</li> </ul> | <ul style="list-style-type: none"> <li>• Jeong et al. [50]</li> <li>• Honarmand et al. [51]</li> <li>• Shivastava et al. [75]</li> <li>• Kiskovà et al. [74]</li> <li>• Elbaz et al. [76]</li> <li>• Elbaz et al. [78]</li> <li>• Sharma et al. [91]</li> <li>• De Patrocellis et al. [92]</li> </ul> |
| <b>Cannabinol (CBN)</b> | <p><u>Lung cancer:</u></p> <ul style="list-style-type: none"> <li>• Inhibition of tumor growth <i>in vivo</i> and <i>in vitro</i></li> </ul>                                                                                                                                                                                                                                                                                                                                                                                                                                                                                                                                                                                                                                                                                                                                                                                                                                                                                                                                                                                                       | <ul style="list-style-type: none"> <li>• Munson et al. [65]</li> </ul>                                                                                                                                                                                                                                |
| <b>JWH-015</b>          | <p><u>Lung cancer:</u></p> <ul style="list-style-type: none"> <li>• EMT inhibition and TAMs recruitment inhibition at the tumor site <i>in vivo</i></li> <li>• Inhibition of EGF-induced proliferation, migration and invasion in NSCLC cell lines and tumor growth and dissemination <i>in vivo</i></li> </ul> <p><u>Gastrointestinal cancers:</u></p> <ul style="list-style-type: none"> <li>• Inhibition of tumor growth <i>in vitro</i> and <i>in vivo</i> associated to increased ceramide, ER-stress, PPAR-<math>\gamma</math> activity and autophagy (Hepatocellular)</li> </ul>                                                                                                                                                                                                                                                                                                                                                                                                                                                                                                                                                            | <ul style="list-style-type: none"> <li>• Ravi et al. [71]</li> <li>• Preet et al. [64]</li> <li>• Vara et al. [53]</li> </ul>                                                                                                                                                                         |
| <b>JWH-133</b>          | <p><u>Brain Cancer:</u></p> <ul style="list-style-type: none"> <li>• Inhibition of angiogenesis of malignant gliomas after local administration of nonpsychotic cannabinoid JWH-133 to mice</li> </ul> <p><u>Lung cancer:</u></p> <ul style="list-style-type: none"> <li>• Decrease of cellular migration after ICAM1 and TIMP1 induction</li> <li>• Inhibition of angiogenic and lymphangiogenic factors release</li> </ul> <p><u>Thyroid cancer:</u></p> <ul style="list-style-type: none"> <li>• Regression of thyroid tumours generated in nude mice by inoculation of the TC cells ARO/CB2</li> </ul>                                                                                                                                                                                                                                                                                                                                                                                                                                                                                                                                         | <ul style="list-style-type: none"> <li>• Blàzquez et al. [116]</li> <li>• Ramer et al. [5]</li> <li>• Staiano et al. [63]</li> <li>• Shi et al., [106]</li> </ul>                                                                                                                                     |
| <b>Win55,212-2</b>      | <p><u>Lung cancer:</u></p>                                                                                                                                                                                                                                                                                                                                                                                                                                                                                                                                                                                                                                                                                                                                                                                                                                                                                                                                                                                                                                                                                                                         |                                                                                                                                                                                                                                                                                                       |

|                                     |                                                                                                                                                                                                                                                                                                                                                                                                                                                                                                                                                                                                                                                                                                                                                                                                                                                     |                                                                                                                                                                                                  |
|-------------------------------------|-----------------------------------------------------------------------------------------------------------------------------------------------------------------------------------------------------------------------------------------------------------------------------------------------------------------------------------------------------------------------------------------------------------------------------------------------------------------------------------------------------------------------------------------------------------------------------------------------------------------------------------------------------------------------------------------------------------------------------------------------------------------------------------------------------------------------------------------------------|--------------------------------------------------------------------------------------------------------------------------------------------------------------------------------------------------|
|                                     | <ul style="list-style-type: none"> <li>• Inhibition of EGF-induced proliferation, migration and invasion in NSCLC cell lines and tumor growth and dissemination <i>in vivo</i></li> </ul> <p><u>Gastrointestinal cancer:</u></p> <ul style="list-style-type: none"> <li>• Inhibition of proliferation and pro-apoptotic effect <i>in vitro</i> (Gastric)</li> <li>• Inhibition of Akt activation and release inhibition of pro-migratory factors (MMP2, VEGF-A) <i>in vitro</i> and <i>in vivo</i> (Gastric)</li> </ul> <p><u>Prostate cancer:</u></p> <ul style="list-style-type: none"> <li>• Inhibition cells survival, growth and proliferation by inhibition of PI3K/Akt/mTOR axis</li> </ul>                                                                                                                                                  | <ul style="list-style-type: none"> <li>• Preet et al. [64]</li> <li>• Xian et al. [59]</li> <li>• Xian et al. [60]</li> <li>• Morell et al. [89]</li> </ul>                                      |
| <b>AM251</b>                        | <p><u>Pancreatic cancer:</u></p> <ul style="list-style-type: none"> <li>• Induction of cytotoxic effects via a receptor-independent mechanism in Mia PaCa2 cell line</li> </ul>                                                                                                                                                                                                                                                                                                                                                                                                                                                                                                                                                                                                                                                                     | <ul style="list-style-type: none"> <li>• Fogli et al. [103]</li> </ul>                                                                                                                           |
| <b>pyrrolo-1,5-benzoxazepine-15</b> | <p><u>Gastrointestinal cancer:</u></p> <ul style="list-style-type: none"> <li>• Inhibition of proliferation and pro-apoptotic effect in CRC cell lines; synergistic interaction with 5-FU (Colorectal)</li> </ul>                                                                                                                                                                                                                                                                                                                                                                                                                                                                                                                                                                                                                                   | <ul style="list-style-type: none"> <li>• Fiore et al. [46]</li> </ul>                                                                                                                            |
| <b>Rimonabant (SR141716)</b>        | <p><u>Brain Cancer:</u></p> <ul style="list-style-type: none"> <li>• Cell proliferation arrest, induction caspase-dependent apoptosis and upregulation of the expression of NKG2D ligands</li> </ul> <p><u>Gastrointestinal cancer:</u></p> <ul style="list-style-type: none"> <li>• Induction of G2/M arrest and mitotic catastrophe <i>in vitro</i>; inhibition of ACF number <i>in vivo</i> (Colorectal)</li> <li>• Wnt/<math>\beta</math>-catenin canonical pathway inhibition <i>in vitro</i> and <i>in vivo</i> associated to <math>\beta</math>-catenin degradation and TCF/LEF transcriptional inhibition (Colorectal)</li> <li>• Improvement of 5-FU efficacy in CRC <i>in vitro</i> models;</li> <li>• Decrease of CD133+/CD44+ population and spheroid formation</li> <li>• Synergistic effect with Oxaliplatin in CRC models</li> </ul> | <ul style="list-style-type: none"> <li>• Ciaglia et al. [119]</li> <li>• Santoro et al. [55]</li> <li>• Proto et al. [56]</li> <li>• Fiore et al. [57]</li> <li>• Gazzero et al. [58]</li> </ul> |
| <b>URB597</b>                       | <p><u>Lung cancer:</u></p> <ul style="list-style-type: none"> <li>• Inhibition of lung cancer cells spreading</li> <li>• Enforced the effect Met-F-AEA in inhibiting EGFR phosphorylation and its downstream signal transduction pathways</li> </ul> <p><u>Gastrointestinal cancer:</u></p> <ul style="list-style-type: none"> <li>• Reduction of CRC cell lines proliferation</li> </ul>                                                                                                                                                                                                                                                                                                                                                                                                                                                           | <ul style="list-style-type: none"> <li>• Winkler et al., 2016 [17]</li> <li>• Ravi et al., 2014 [66]</li> <li>• Proto et al., 2012 [45]</li> </ul>                                               |

|                                                      |                                                                                                                                                                                                                                                                                                                                                                                                                       |                                                                                                                      |
|------------------------------------------------------|-----------------------------------------------------------------------------------------------------------------------------------------------------------------------------------------------------------------------------------------------------------------------------------------------------------------------------------------------------------------------------------------------------------------------|----------------------------------------------------------------------------------------------------------------------|
| <p><b>GW405833</b><br/><b>(GW)</b></p>               | <p><u>Pancreatic cancer:</u></p> <ul style="list-style-type: none"> <li>• Induction of ROS-mediated autophagy via activation of AMPK and inhibition of energetic metabolism</li> <li>• Inhibition of glycolysis via decreasing of the glycolytic enzymes, GAPDH and PKM2</li> <li>• Increase of the anticancer potential in combination with gemcitabine</li> </ul>                                                   | <ul style="list-style-type: none"> <li>• Dando et al., 2013 [100]</li> <li>• Donadelli et al., 2011 [101]</li> </ul> |
| <p><b>2-Arachidonoylglycerol</b><br/><b>2-AG</b></p> | <p><u>Prostate cancer:</u></p> <ul style="list-style-type: none"> <li>• Inactivation of protein kinase A and inhibition of the invasive ability of the cells</li> </ul> <p><u>Pancreatic cancer:</u></p> <ul style="list-style-type: none"> <li>• Inhibition of cancer cell proliferation both <i>in vitro</i> and orthotopic animal models</li> <li>• Immunomodulatory effects in tumour microenvironment</li> </ul> | <ul style="list-style-type: none"> <li>• Nithipatikom et al., 2004 [87]</li> <li>• Qiu et al., 2019 [102]</li> </ul> |
